# Supplementary material for: Effects of PIN on Osteoblast Differentiation and Matrix Mineralization through Runt-Related Transcription Factor
Source: Int J Mol Sci. 2020 Dec 16;21(24):9579. doi: 10.3390/ijms21249579 (PMC7765567; doi:10.3390/ijms21249579)
Supplement: Supplementary file 1 [file ijms-21-09579-s001.pdf]

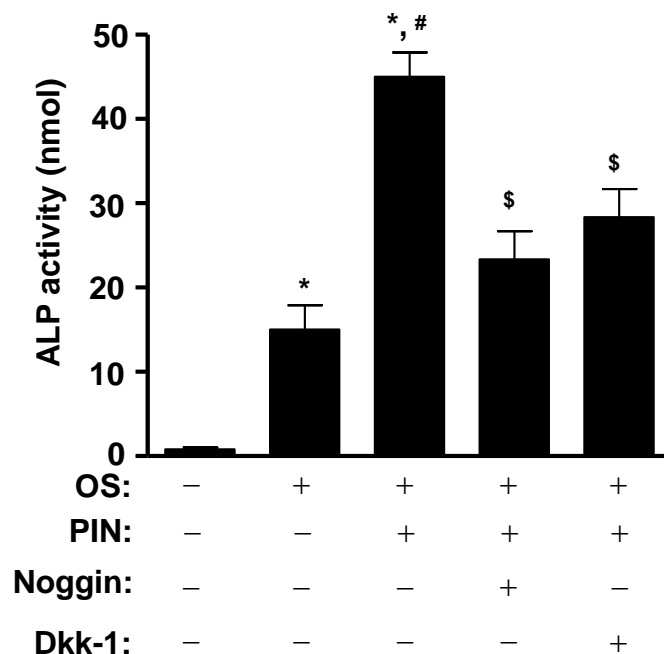

**Supplementary Figure 1. PIN-induced osteoblast differentiation is mediated by BMP2 and  $\beta$ -catenin signaling.**

After pre-osteoblasts were differentiated with PIN in the absence and presence of Noggin and Dkk-1 for 7 days, ALP activity was measured at 405 nm using a spectrophotometer

Data represent the mean  $\pm$  S.E.M. of experiments. \*: statistically significant difference compared with the control ( $p < 0.05$ ). #: statistically significant difference compared with OS ( $p < 0.05$ ). . \$: statistically significant difference compared with the OS + PIN ( $p < 0.05$ ).
